# Supplementary material
Source: HighWire-hosted journal article supplement (https://www.plantcell.org/content/suppl/2006/09/27/tpc.106.046110)
Supplement: Supp_Fig_4.pdf [file Supp_Fig_4.pdf]

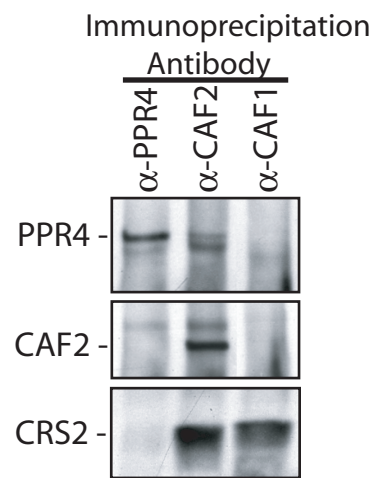

Supplemental Figure 4. Assay for coimmunoprecipitation of PPR4 with CAF2/CRS2 complex.

Immunoprecipitations from chloroplast stroma were performed with the antibody indicated at the top. Replicate immunoblots of the immunoprecipitates were probed to detect PPR4, CAF2, and CRS2. A small amount of PPR4 was detected in the CAF2 immunoprecipitate but no CAF2 and little CRS2 were detected in the PPR4 immunoprecipitate. However, only a small fraction of the PPR4 in the chloroplast is found in a high molecular weight complex (see Figure 3) and only a small fraction of CAF2 and CRS2 are associated with rps12 intron RNA (see Ostheimer et al., 2003), so these results do not eliminate the possibility that PPR4 and CAF2 are bound simultaneously to the rps12-int1 RNA.
